# Supplementary material for: Cytotoxic Tetrahydroxanthone Dimers from the Mangrove-Associated Fungus Aspergillus versicolor HDN1009
Source: PubMed Central journal article supplement (PMC6164687; doi:10.3390/md16090335), 2018-09-14

Supporting Information

**Cytotoxic Tetrahydroxanthone Dimers from the  
Mangrove-Associated Fungus *Aspergillus versicolor*  
HDN1009**

**Guihong Yu <sup>1</sup>, Guangwei Wu <sup>1</sup>, Zichao Sun <sup>1</sup>, Xiaomin Zhang <sup>1</sup>, Qian Che <sup>1</sup>, Qianqun Gu <sup>1</sup>, Tianjiao,  
Zhu <sup>1,2</sup>, Dehai Li <sup>1,2,3</sup> and Guojian Zhang<sup>1,2,\*</sup>**

<sup>1</sup> Key Laboratory of Marine Drugs, Chinese Ministry of Education, School of Medicine and Pharmacy, Ocean University of China, Qingdao 266003, P. R. China; Yuguihong1990@126.com (G.Y.); gweiwu@163.com (G.W.); 171774170@163.com (Z.S.); xiaominzhang91@163.com (X.Z.); cheqian064@ouc.edu.cn (Q. C.); guqianq@ouc.edu.cn (Q.G.) zhutj@ouc.edu.cn (T.Z.); dehaili@ouc.edu.cn (D.L.)

<sup>2</sup> Laboratory for Marine Drugs and Bioproducts of Qingdao Pilot National Laboratory for Marine Science and Technology, Qingdao, 266237, P. R. China

<sup>3</sup> Open Studio for Druggability Research of Marine Natural Products, Qingdao Pilot National Laboratory for Marine Science and Technology, Qingdao, 266237, China

\* Correspondence: E-mail: zhangguojian@ouc.edu.cn; Tel.: +86 532-82032065.

## List of Supporting Information

|                                                                                                                           |     |
|---------------------------------------------------------------------------------------------------------------------------|-----|
| Figure S1. <sup>1</sup> H NMR spectrum (500 MHz) of 5- <i>epi</i> -asperdichrome ( <b>1</b> ) in CDCl <sub>3</sub> .....  | S3  |
| Figure S2. <sup>13</sup> C NMR spectrum (125 MHz) of 5- <i>epi</i> -asperdichrome ( <b>1</b> ) in CDCl <sub>3</sub> ..... | S3  |
| Figure S3. HSQC spectrum of 5- <i>epi</i> -asperdichrome ( <b>1</b> ) .....                                               | S4  |
| Figure S4. <sup>1</sup> H- <sup>1</sup> H COSY spectrum of 5- <i>epi</i> -asperdichrome ( <b>1</b> ) .....                | S4  |
| Figure S5. HMBC spectrum of 5- <i>epi</i> -asperdichrome ( <b>1</b> ) .....                                               | S5  |
| Figure S6. NOE spectrum of 5- <i>epi</i> -asperdichrome ( <b>1</b> ) .....                                                | S5  |
| Figure S7. HRESIMS spectrum of 5- <i>epi</i> -asperdichrome ( <b>1</b> ) .....                                            | S7  |
| Figure S8. <sup>1</sup> H NMR spectrum (500 MHz) of versixanthone N ( <b>2</b> ) in CDCl <sub>3</sub> .....               | S8  |
| Figure S9. <sup>13</sup> C NMR spectrum (125 MHz) of versixanthone N ( <b>2</b> ) in CDCl <sub>3</sub> .....              | S8  |
| Figure S10. HSQC spectrum of versixanthone N ( <b>2</b> ) .....                                                           | S9  |
| Figure S11. <sup>1</sup> H- <sup>1</sup> H COSY spectrum of versixanthone N ( <b>2</b> ) .....                            | S9  |
| Figure S12. HMBC spectrum of versixanthone N ( <b>2</b> ) .....                                                           | S10 |
| Figure S13. NOE spectrum of versixanthone N ( <b>2</b> ) .....                                                            | S10 |
| Figure S14. HRESIMS spectrum of versixanthone N ( <b>2</b> ) .....                                                        | S13 |
| Figure S15. <sup>1</sup> H NMR spectrum (500 MHz) of versixanthone O ( <b>3</b> ) in CDCl <sub>3</sub> .....              | S13 |
| Figure S16. <sup>13</sup> C NMR spectrum (125 MHz) of versixanthone O ( <b>3</b> ) in CDCl <sub>3</sub> .....             | S14 |
| Figure S17. HSQC spectrum of versixanthone O ( <b>3</b> ) .....                                                           | S14 |
| Figure S18. <sup>1</sup> H- <sup>1</sup> H COSY spectrum of versixanthone O ( <b>3</b> ).....                             | S15 |
| Figure S19. HMBC spectrum of versixanthone O ( <b>3</b> ) .....                                                           | S15 |
| Figure S20. NOE spectrum of versixanthone O ( <b>3</b> ) .....                                                            | S16 |
| Figure S21. HRESIMS spectrum of versixanthone O ( <b>3</b> ) .....                                                        | S18 |

Figure S1. <sup>1</sup>H NMR spectrum (500 MHz) of 5-*epi*-asperdichrome (**1**) in CDCl<sub>3</sub>

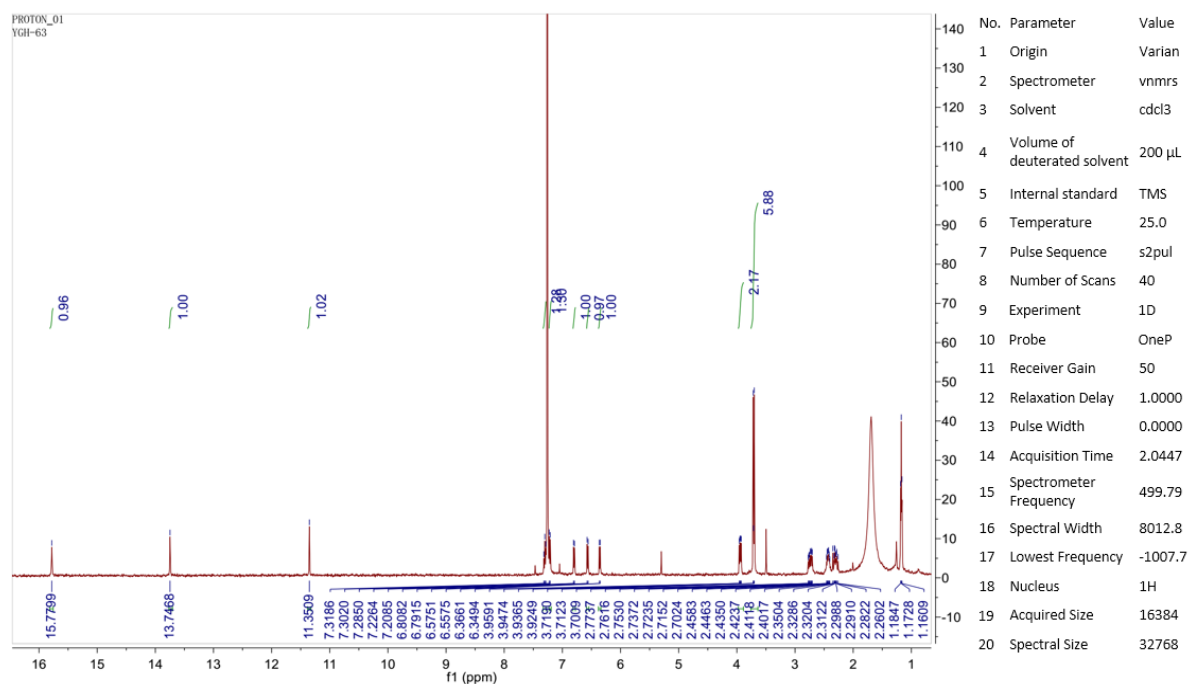

Figure S2. <sup>13</sup>C NMR spectrum (125 MHz) of 5-*epi*-asperdichrome (**1**) in CDCl<sub>3</sub>

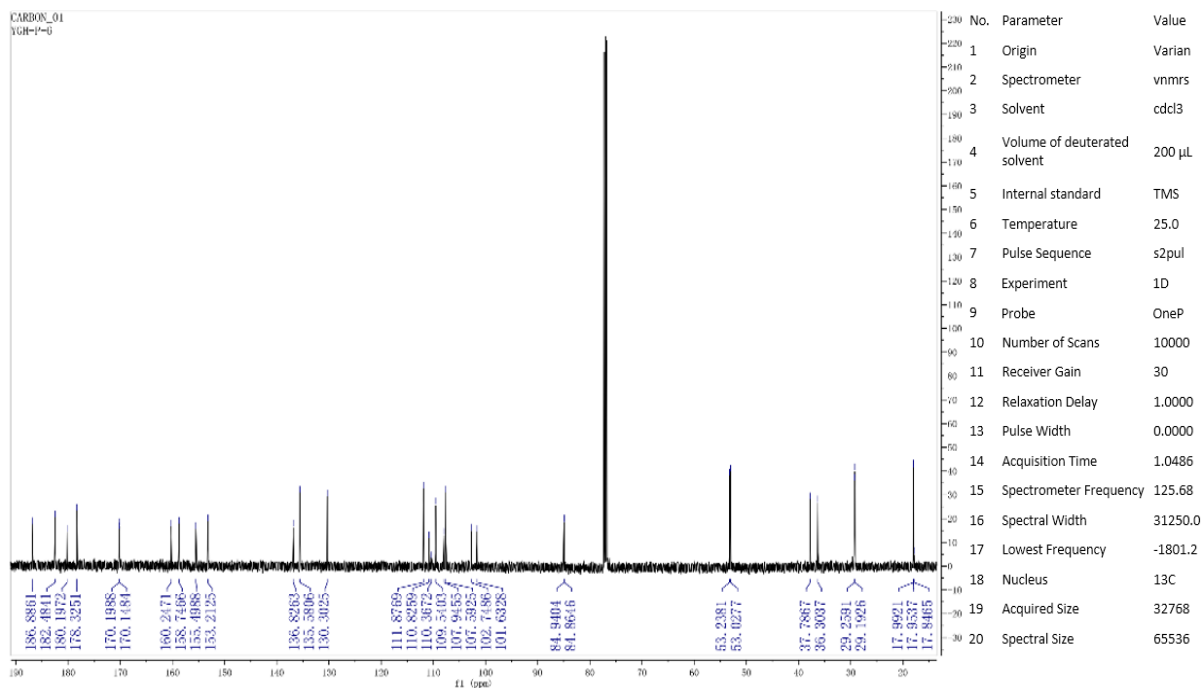

Figure S3. HSQC spectrum of 5-*epi*-asperdichrome (**1**)

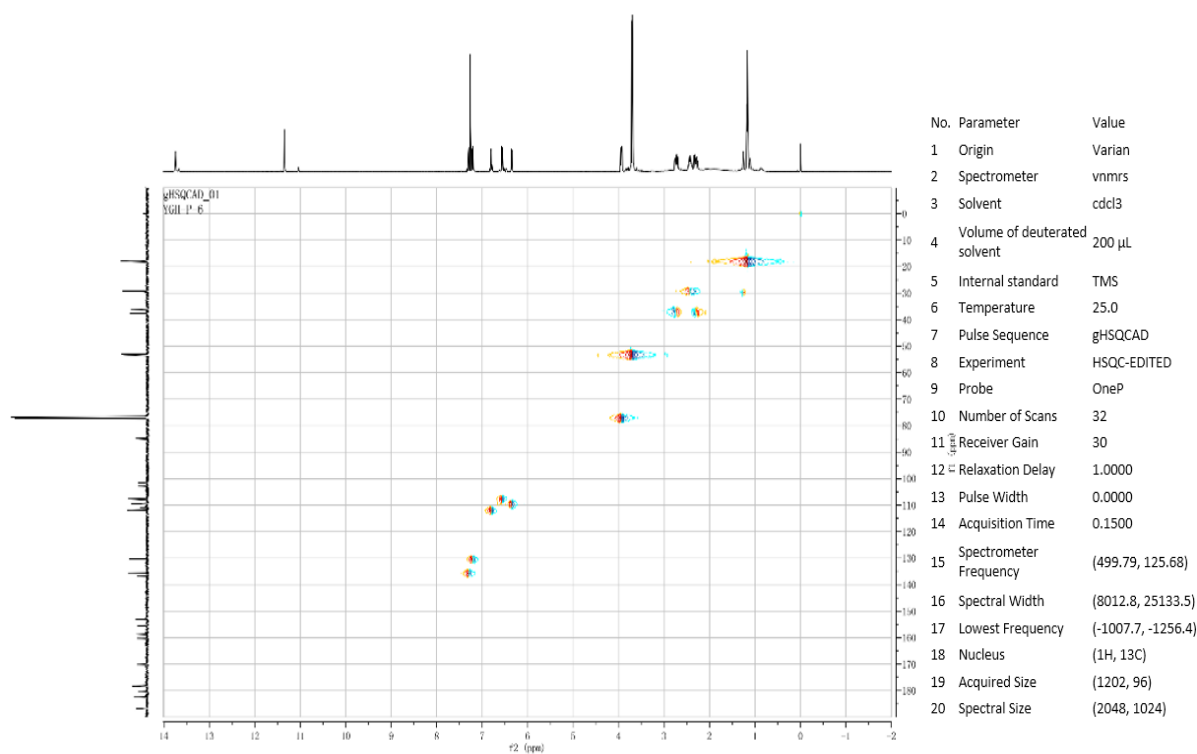

Figure S4. <sup>1</sup>H-<sup>1</sup>H COSY spectrum of 5-*epi*-asperdichrome (**1**)

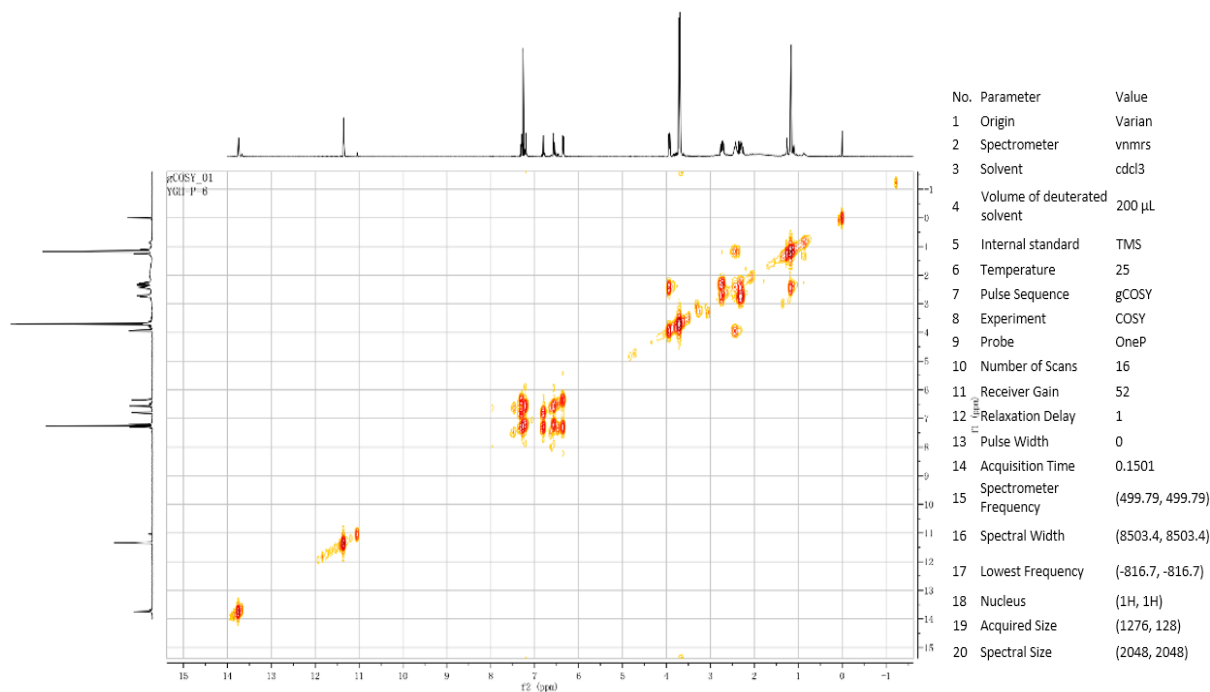

Figure S5. HMBC spectrum of 5-*epi*-asperdichrome (**1**)

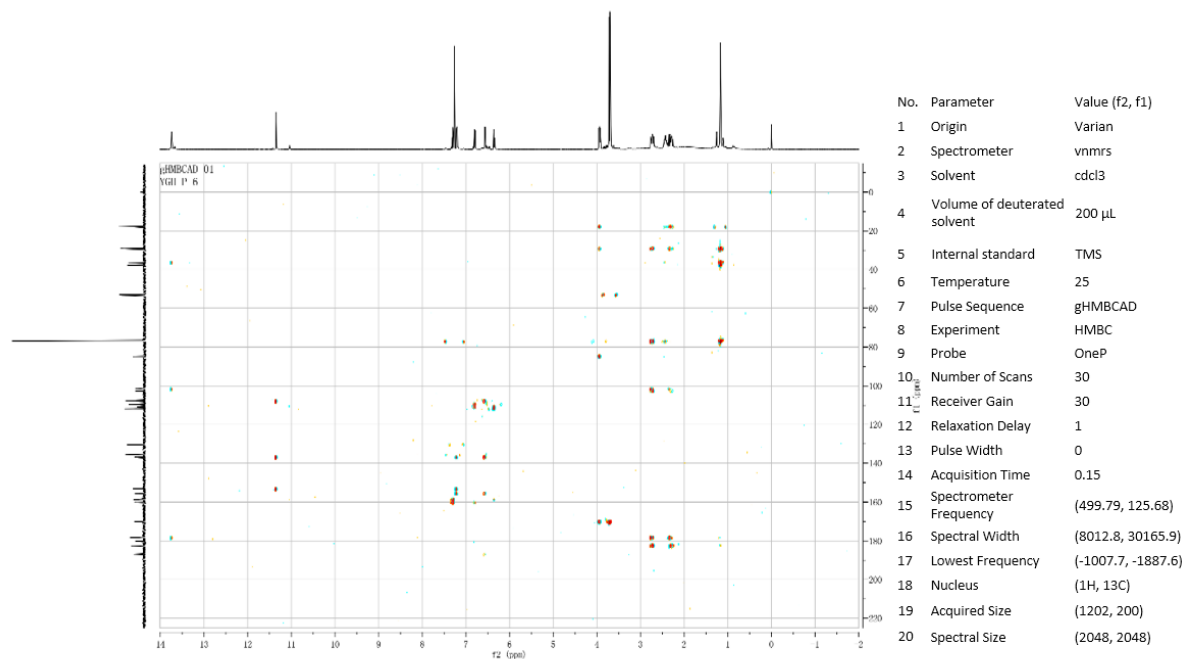

Figure S6. NOE spectrum of 5-*epi*-asperdichrome (**1**)

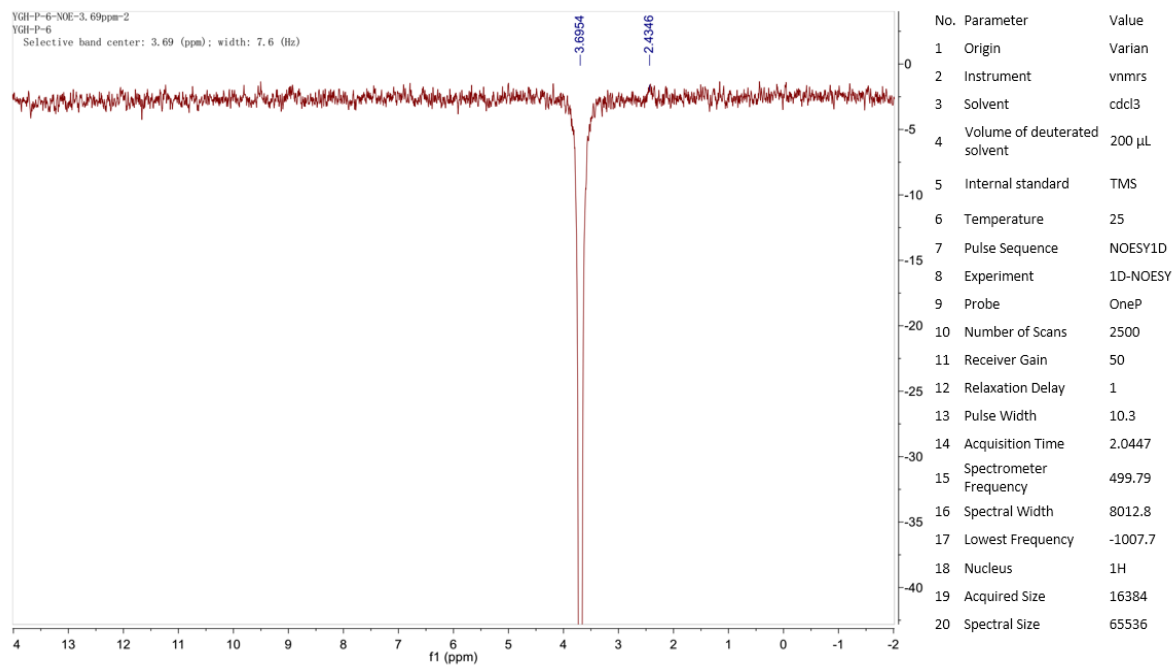

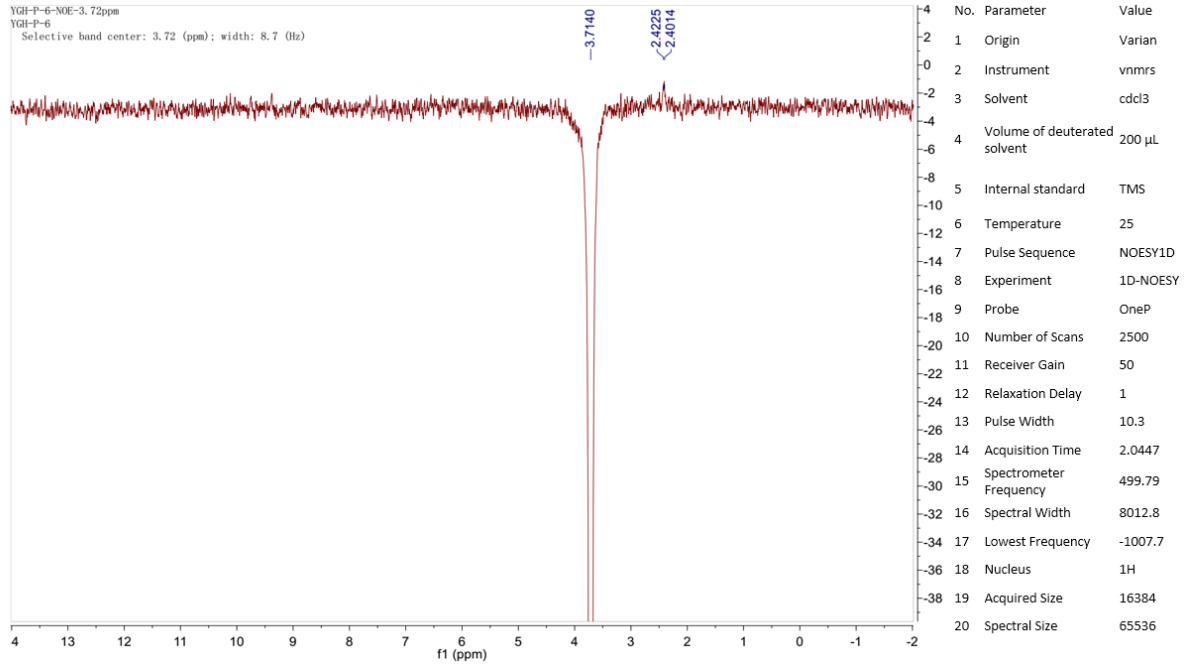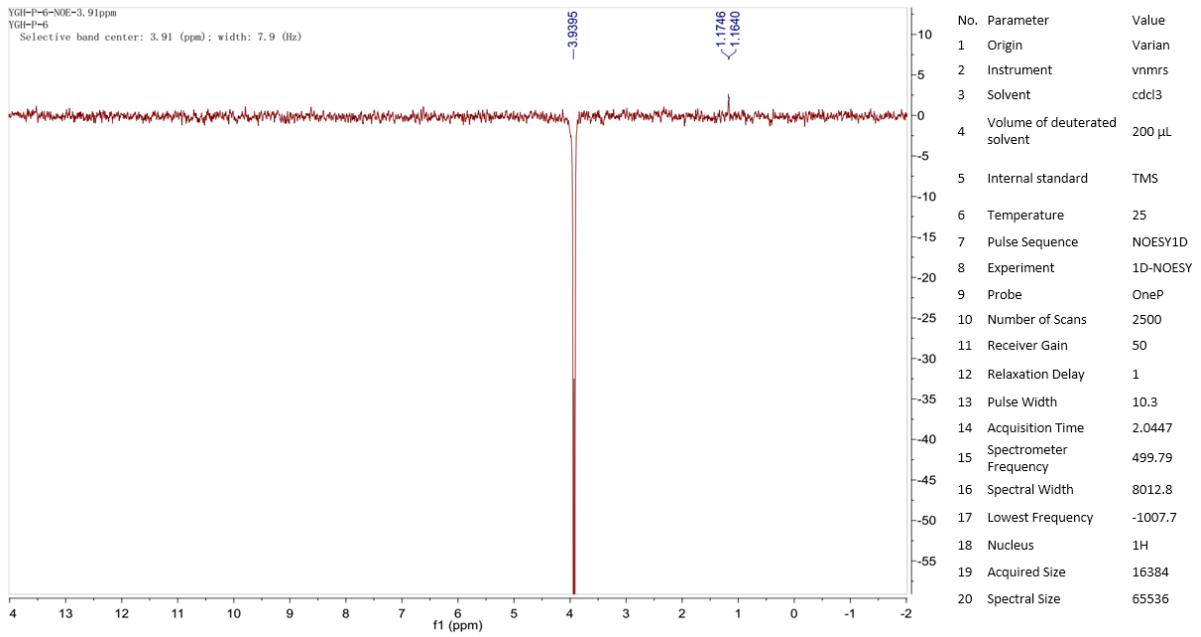

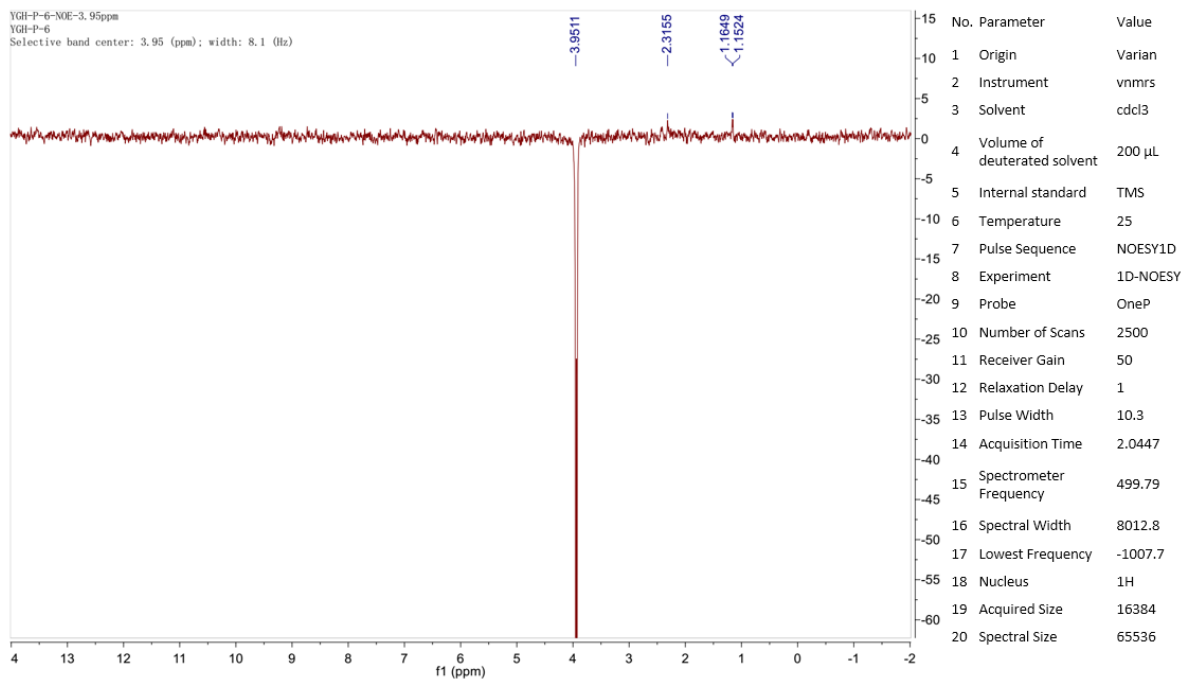

Figure S7. HRESIMS spectrum of 5-*epi*-asperdichrome (**1**)

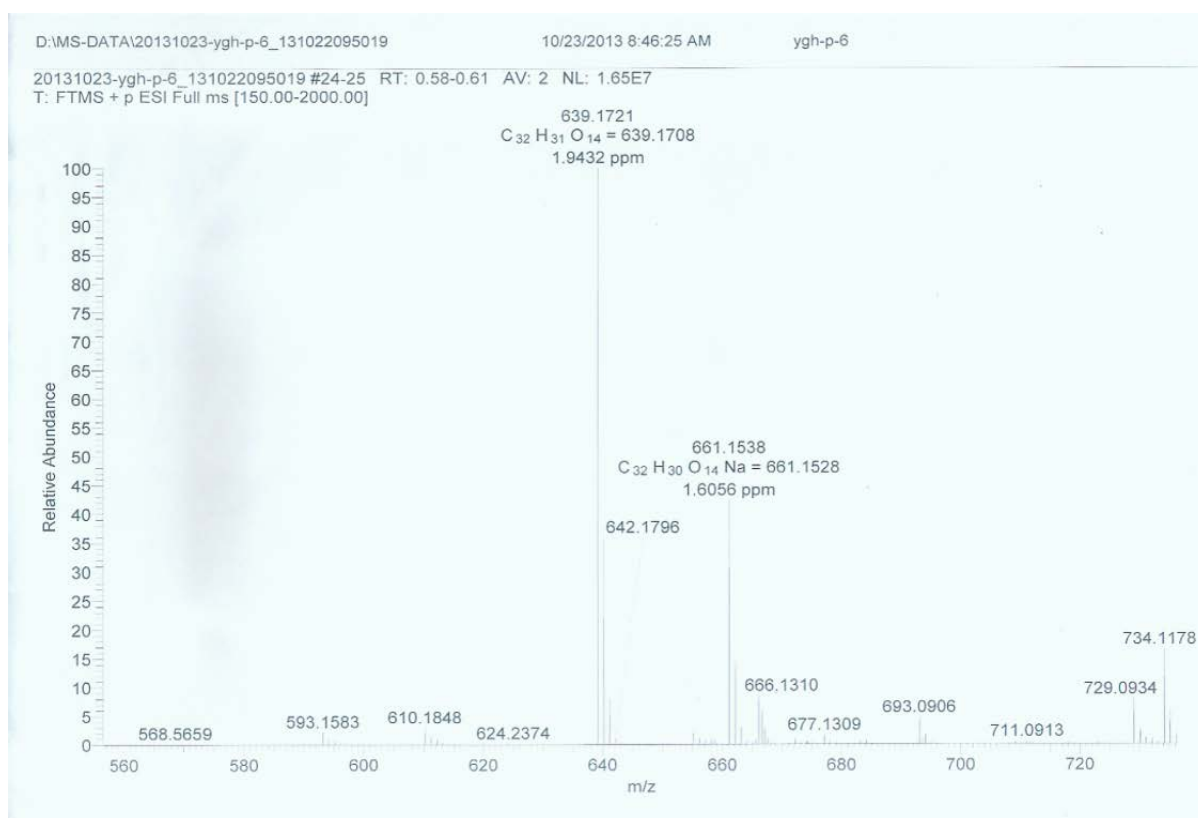

Figure S8. <sup>1</sup>H NMR spectrum (500 MHz) of versixanthone N (**2**) in CDCl<sub>3</sub>

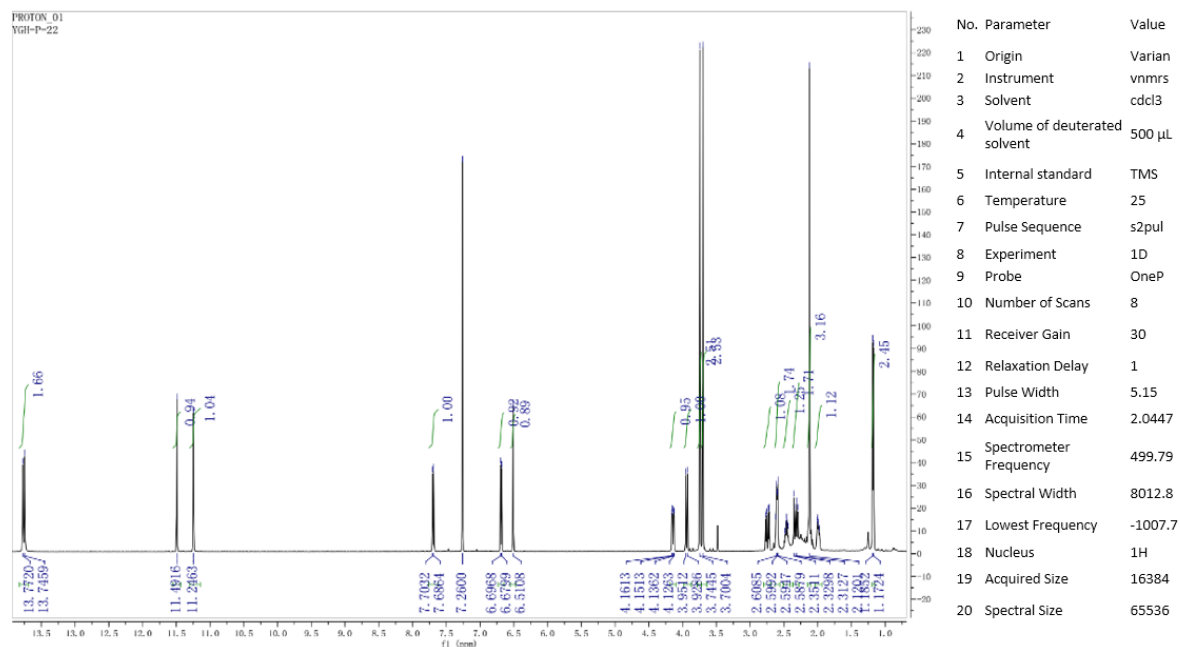

Figure S9. <sup>13</sup>C NMR spectrum (125 MHz) of versixanthone N (**2**) in CDCl<sub>3</sub>

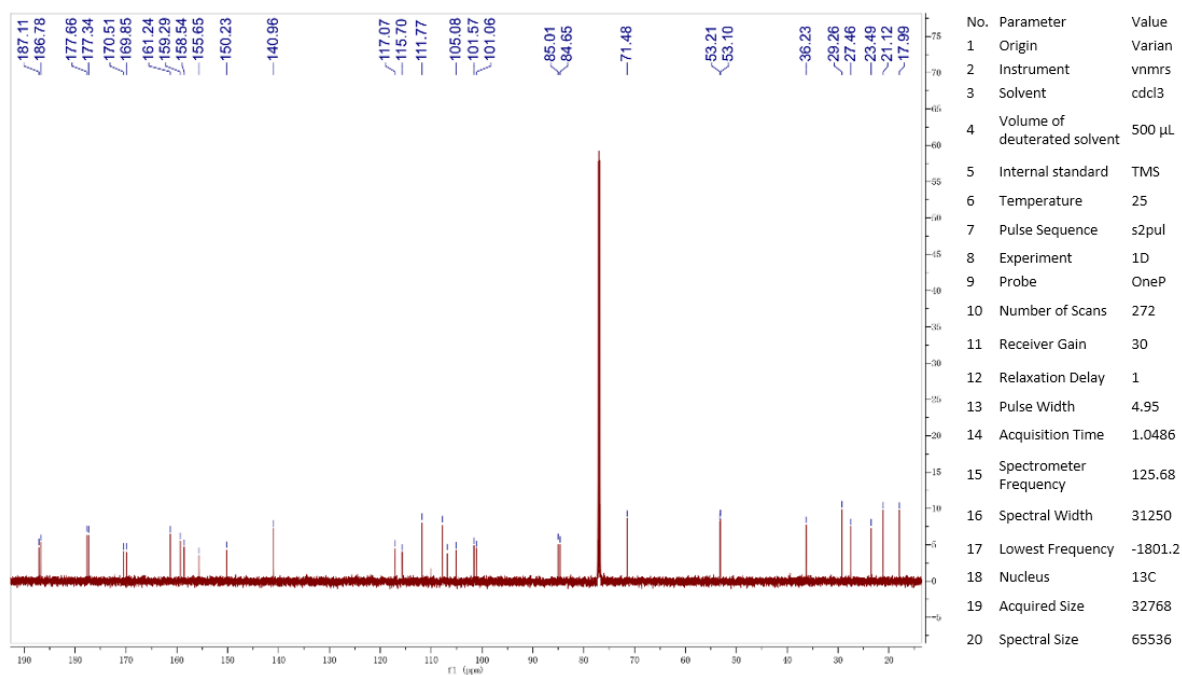



Figure S10. HSQC spectrum of versixanthone N (2)

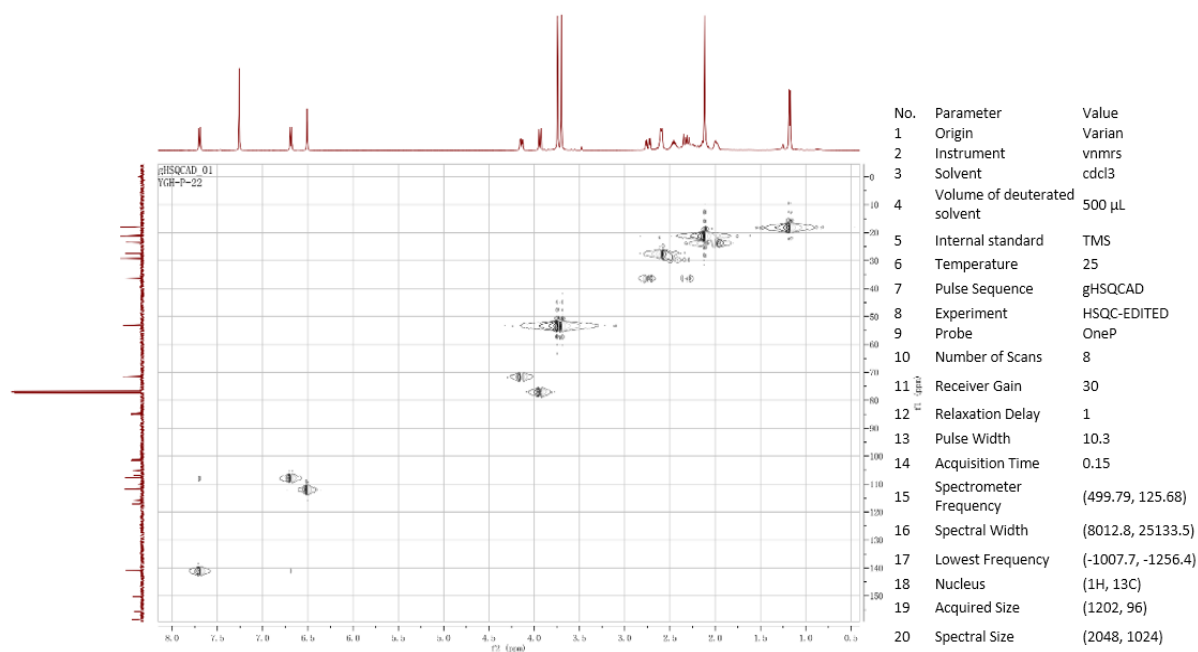

Figure S11. <sup>1</sup>H-<sup>1</sup>H COSY spectrum of versixanthone N (2)

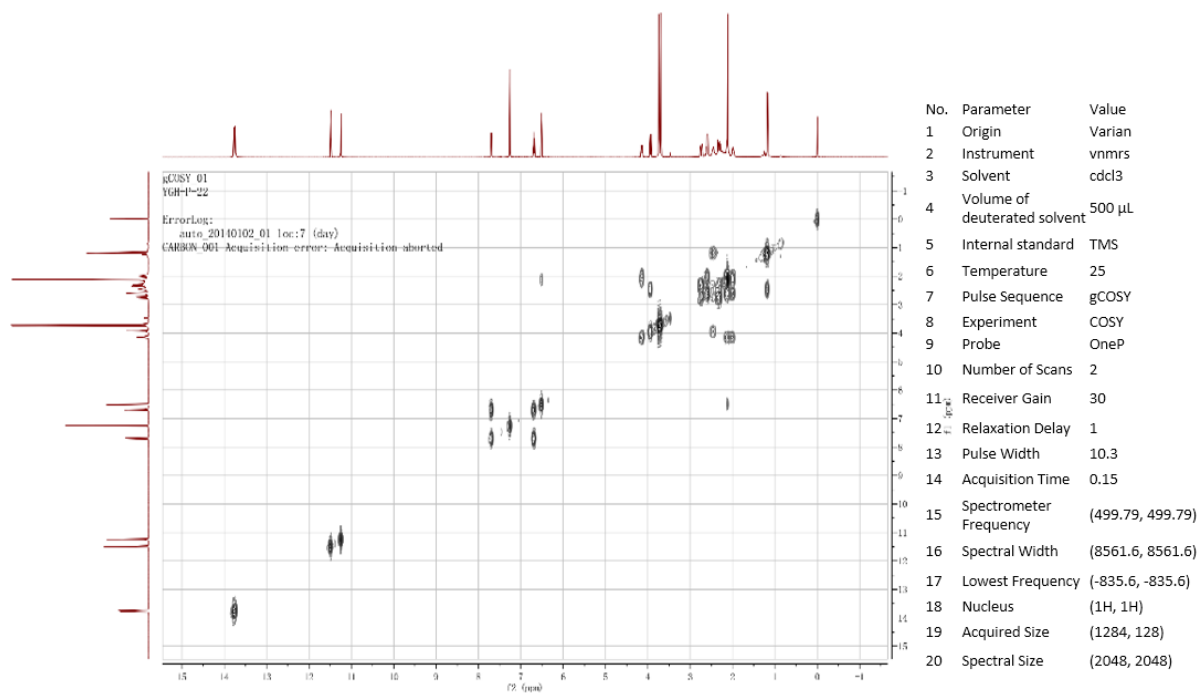

Figure S12. HMBC spectrum of versixanthone N (2)

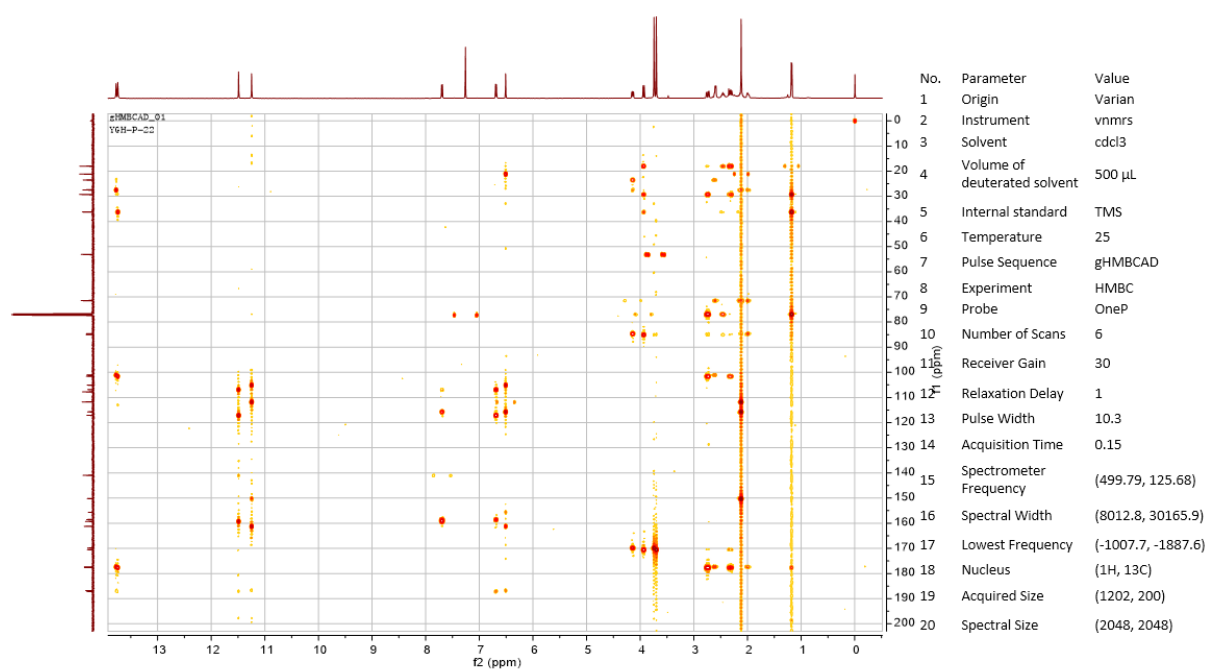

Figure S13. NOE spectrum of versixanthone N (2)

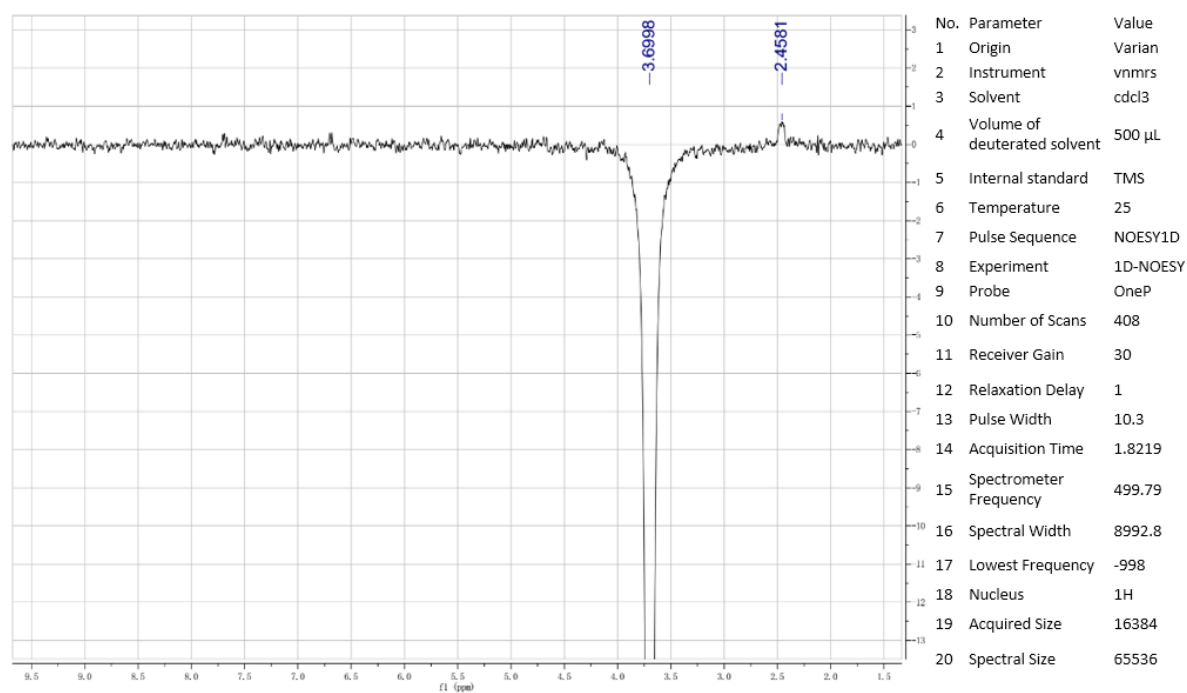

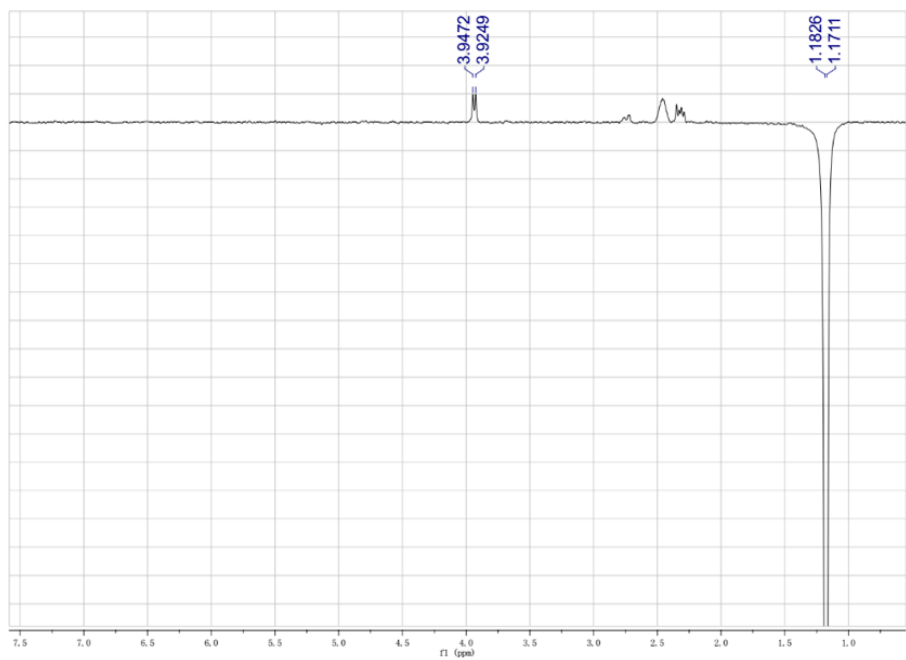

| No. | Parameter                    | Value    |
|-----|------------------------------|----------|
| 1   | Origin                       | Varian   |
| 2   | Instrument                   | nmr5     |
| 3   | Solvent                      | cdcl3    |
| 4   | Volume of deuterated solvent | 500 µL   |
| 5   | Internal standard            | TMS      |
| 6   | Temperature                  | 25       |
| 7   | Pulse Sequence               | NOESY1D  |
| 8   | Experiment                   | 1D-NOESY |
| 9   | Probe                        | OneP     |
| 10  | Number of Scans              | 88       |
| 11  | Receiver Gain                | 30       |
| 12  | Relaxation Delay             | 1        |
| 13  | Pulse Width                  | 10.3     |
| 14  | Acquisition Time             | 1.8219   |
| 15  | Spectrometer Frequency       | 499.79   |
| 16  | Spectral Width               | 8992.8   |
| 17  | Lowest Frequency             | -998     |
| 18  | Nucleus                      | 1H       |
| 19  | Acquired Size                | 16384    |
| 20  | Spectral Size                | 65536    |

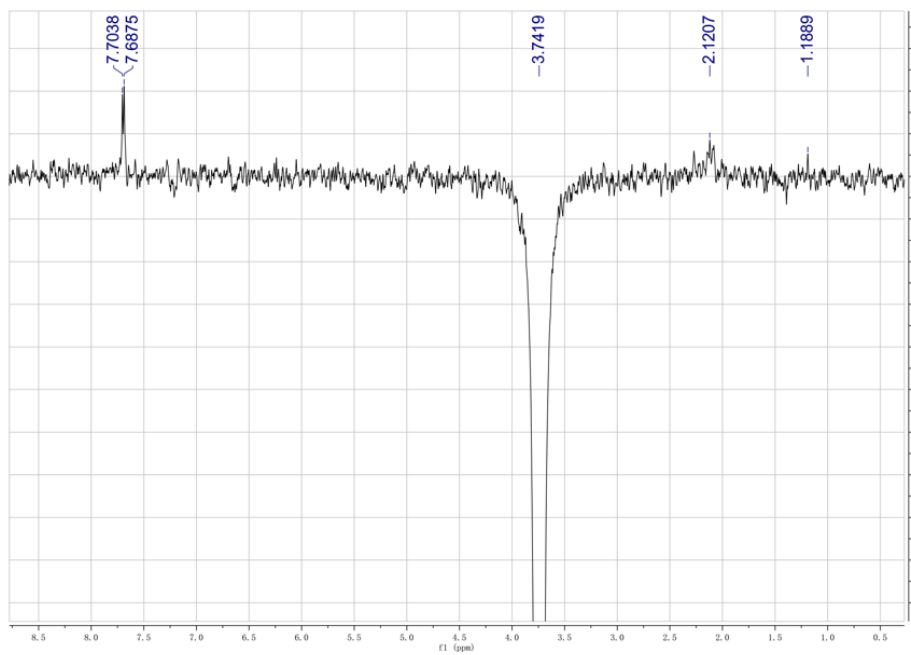

| Parameter | Value                        |          |
|-----------|------------------------------|----------|
| 1         | Origin                       | Varian   |
| 2         | Instrument                   | nmr5     |
| 3         | Solvent                      | cdcl3    |
| 4         | Volume of deuterated solvent | 500 µL   |
| 5         | Internal standard            | TMS      |
| 6         | Temperature                  | 25       |
| 7         | Pulse Sequence               | NOESY1D  |
| 8         | Experiment                   | 1D-NOESY |
| 9         | Probe                        | OneP     |
| 10        | Number of Scans              | 216      |
| 11        | Receiver Gain                | 30       |
| 12        | Relaxation Delay             | 1        |
| 13        | Pulse Width                  | 10.3     |
| 14        | Acquisition Time             | 1.8219   |
| 15        | Spectrometer Frequency       | 499.79   |
| 16        | Spectral Width               | 8992.8   |
| 17        | Lowest Frequency             | -998     |
| 18        | Nucleus                      | 1H       |
| 19        | Acquired Size                | 16384    |
| 20        | Spectral Size                | 65536    |

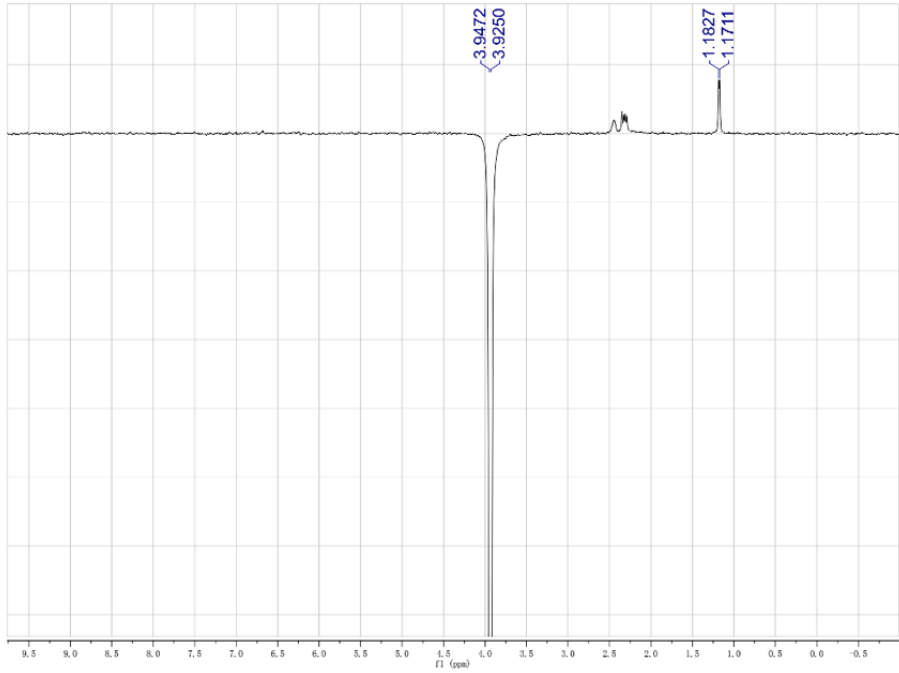

| No. | Parameter                    | Value    |
|-----|------------------------------|----------|
| 1   | Origin                       | Varian   |
| 2   | Instrument                   | nmr3     |
| 3   | Solvent                      | cdcl3    |
| 4   | Volume of deuterated solvent | 500 µL   |
| 5   | Internal standard            | TMS      |
| 6   | Temperature                  | 25       |
| 7   | Pulse Sequence               | NOESY1D  |
| 8   | Experiment                   | 1D-NOESY |
| 9   | Probe                        | OneP     |
| 10  | Number of Scans              | 120      |
| 11  | Receiver Gain                | 30       |
| 12  | Relaxation Delay             | 1        |
| 13  | Pulse Width                  | 10.3     |
| 14  | Acquisition Time             | 1.8219   |
| 15  | Spectrometer Frequency       | 499.79   |
| 16  | Spectral Width               | 8992.8   |
| 17  | Lowest Frequency             | -998     |
| 18  | Nucleus                      | 1H       |
| 19  | Acquired Size                | 16384    |
| 20  | Spectral Size                | 65536    |

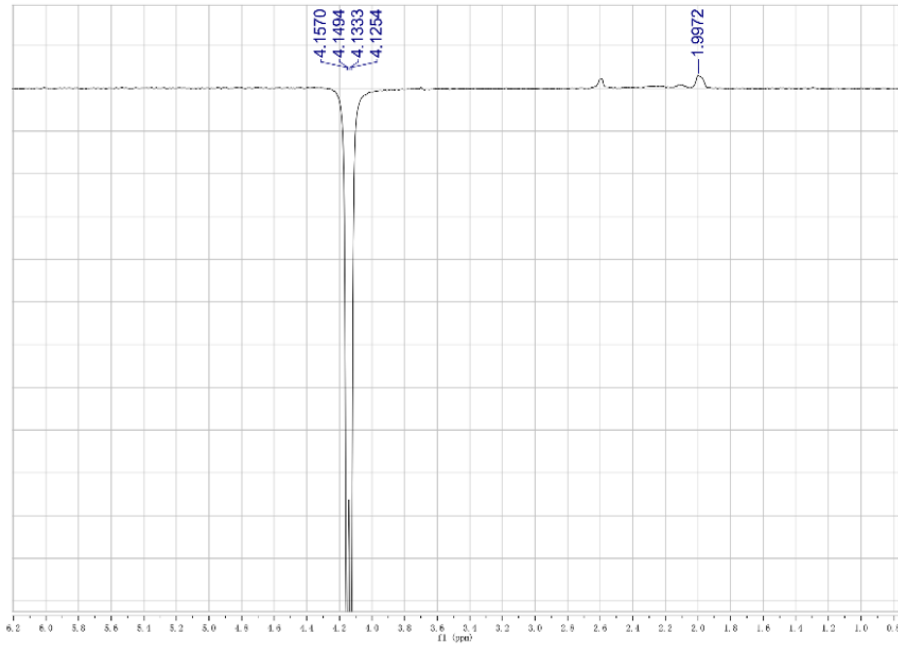

| No. | Parameter                    | Value    |
|-----|------------------------------|----------|
| 1   | Origin                       | Varian   |
| 2   | Instrument                   | nmr3     |
| 3   | Solvent                      | cdcl3    |
| 4   | Volume of deuterated solvent | 500 µL   |
| 5   | Internal standard            | TMS      |
| 6   | Temperature                  | 25       |
| 7   | Pulse Sequence               | NOESY1D  |
| 8   | Experiment                   | 1D-NOESY |
| 9   | Probe                        | OneP     |
| 10  | Number of Scans              | 64       |
| 11  | Receiver Gain                | 30       |
| 12  | Relaxation Delay             | 1        |
| 13  | Pulse Width                  | 10.3     |
| 14  | Acquisition Time             | 1.8219   |
| 15  | Spectrometer Frequency       | 499.79   |
| 16  | Spectral Width               | 8992.8   |
| 17  | Lowest Frequency             | -998     |
| 18  | Nucleus                      | 1H       |
| 19  | Acquired Size                | 16384    |
| 20  | Spectral Size                | 65536    |

Figure S14. HRESIMS spectrum of versixanthone N (2)

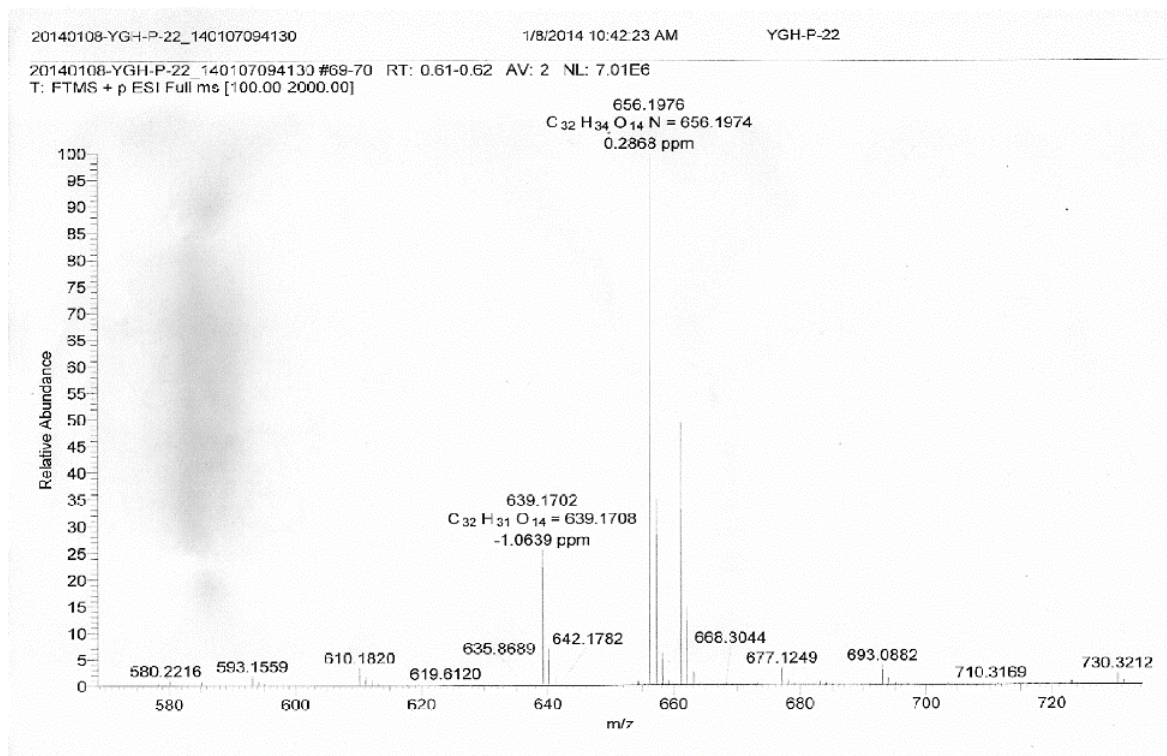

Figure S15. <sup>1</sup>H NMR spectrum (500 MHz) of versixanthone O (3) in CDCl<sub>3</sub>

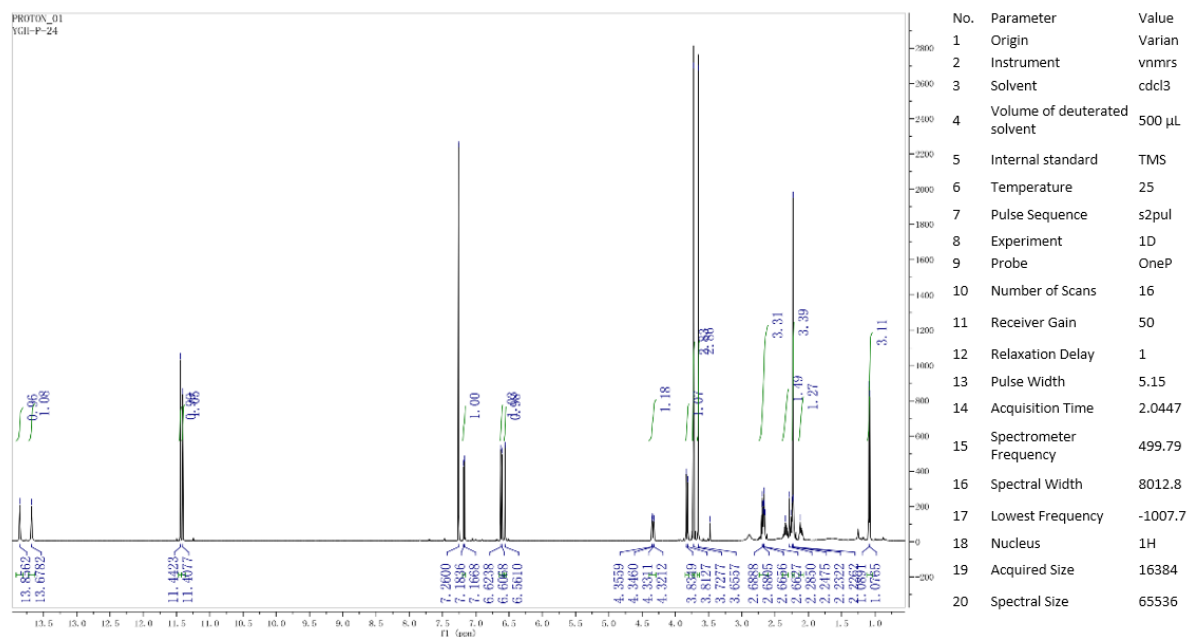

Figure S16.  $^{13}\text{C}$  NMR spectrum (125 MHz) of versixanthone O (**3**) in  $\text{CDCl}_3$

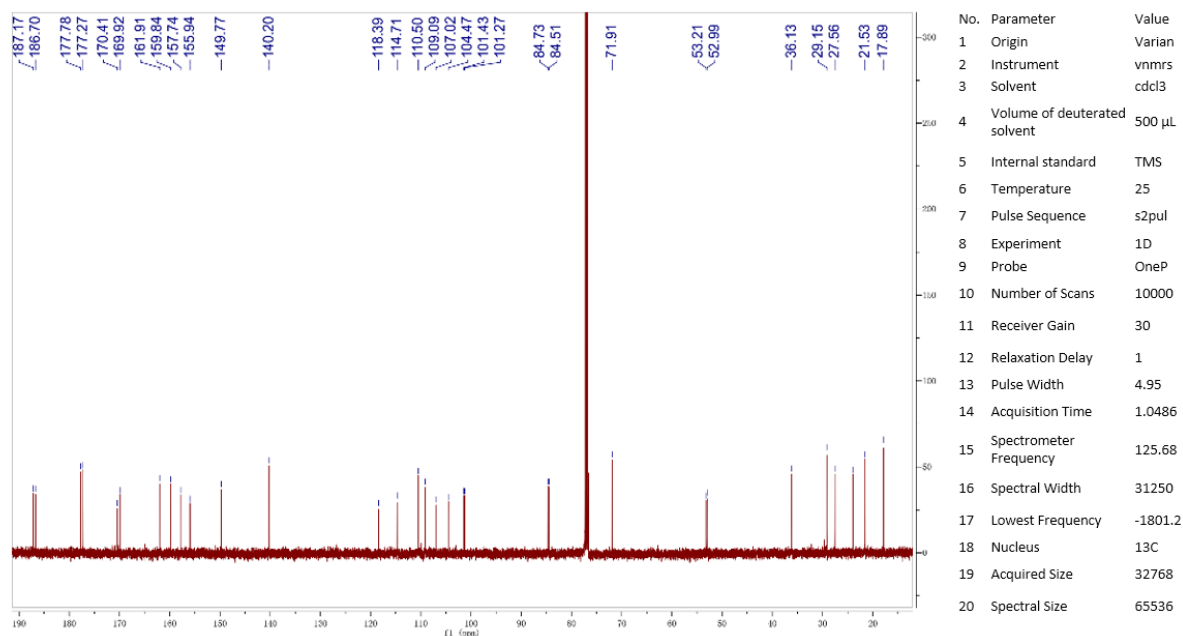

Figure S17. HSQC spectrum of versixanthone O (**3**)

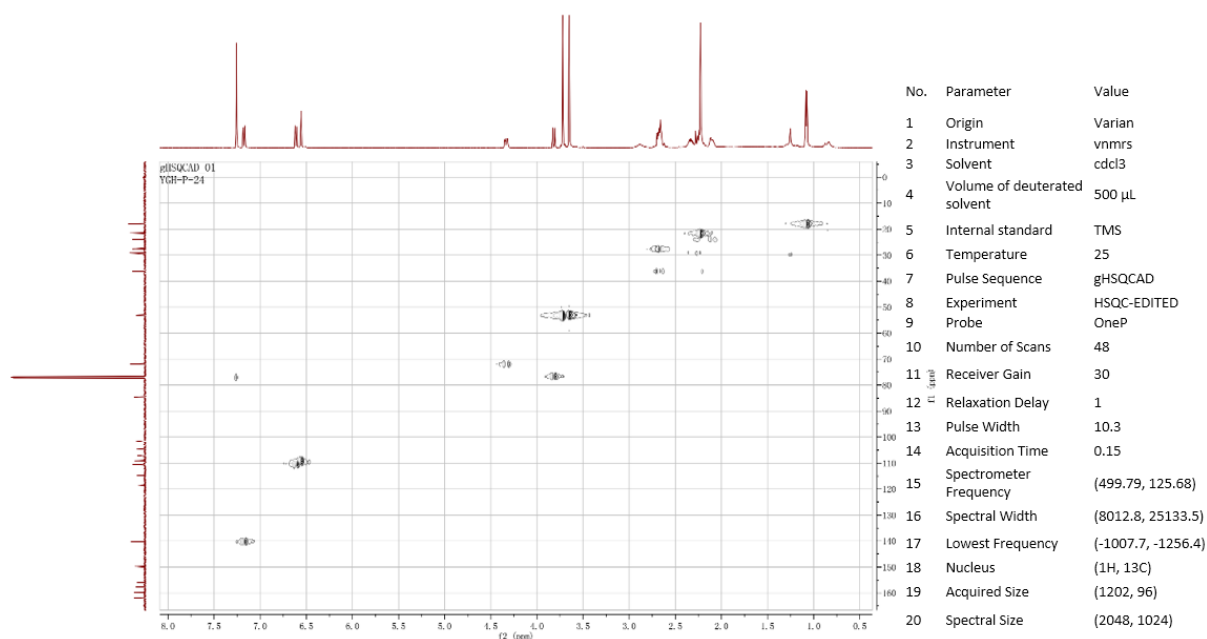

Figure S18.  $^1\text{H}$ - $^1\text{H}$  COSY spectrum of versixanthone O (3)

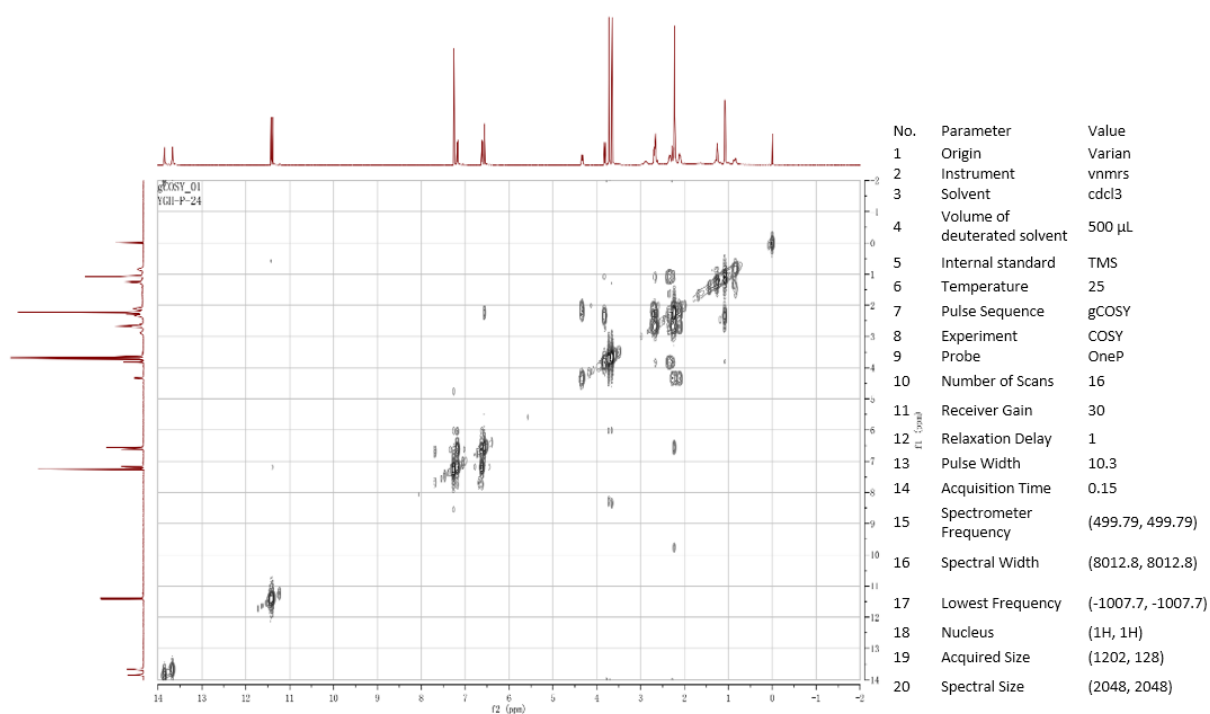

Figure S19. HMBC spectrum of versixanthone O (3)

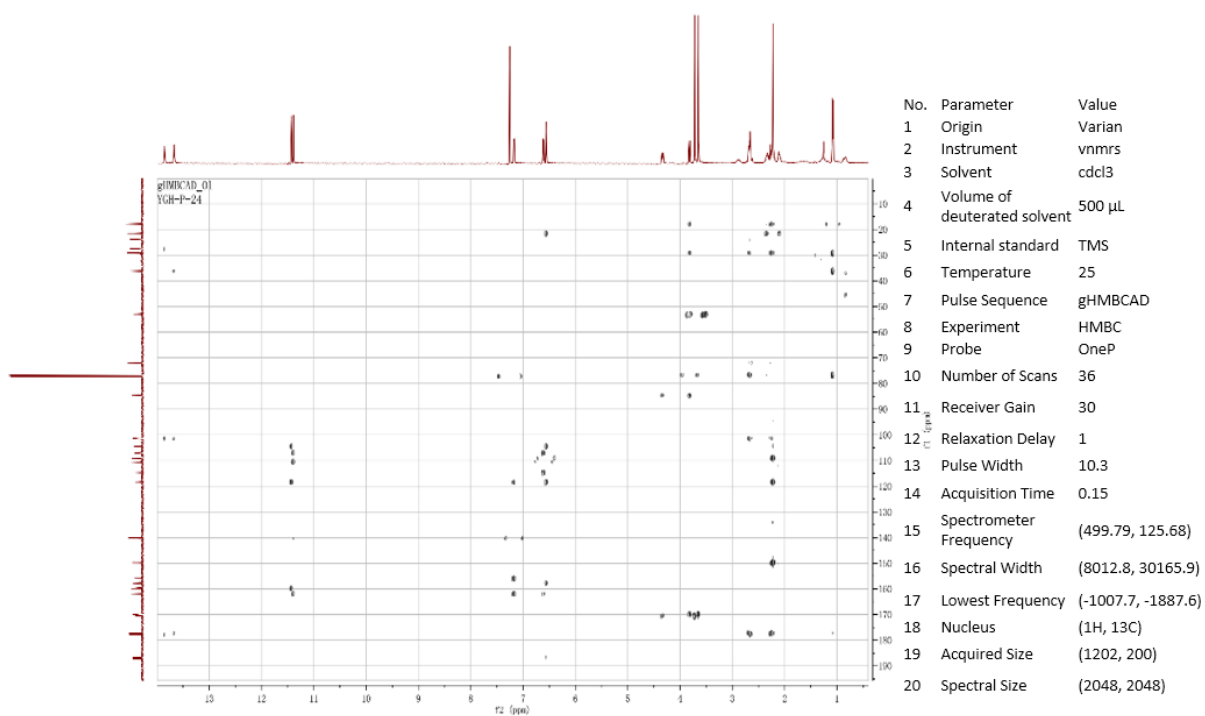

Figure S20. NOE spectrum of versixanthone O (3)

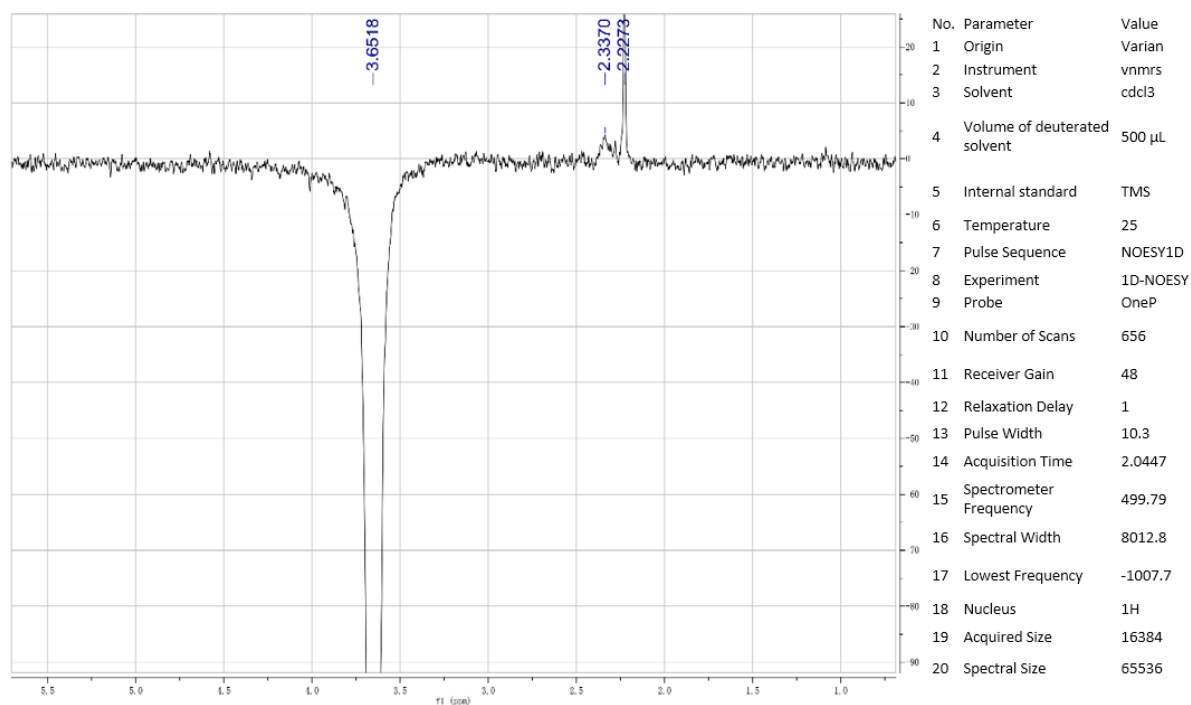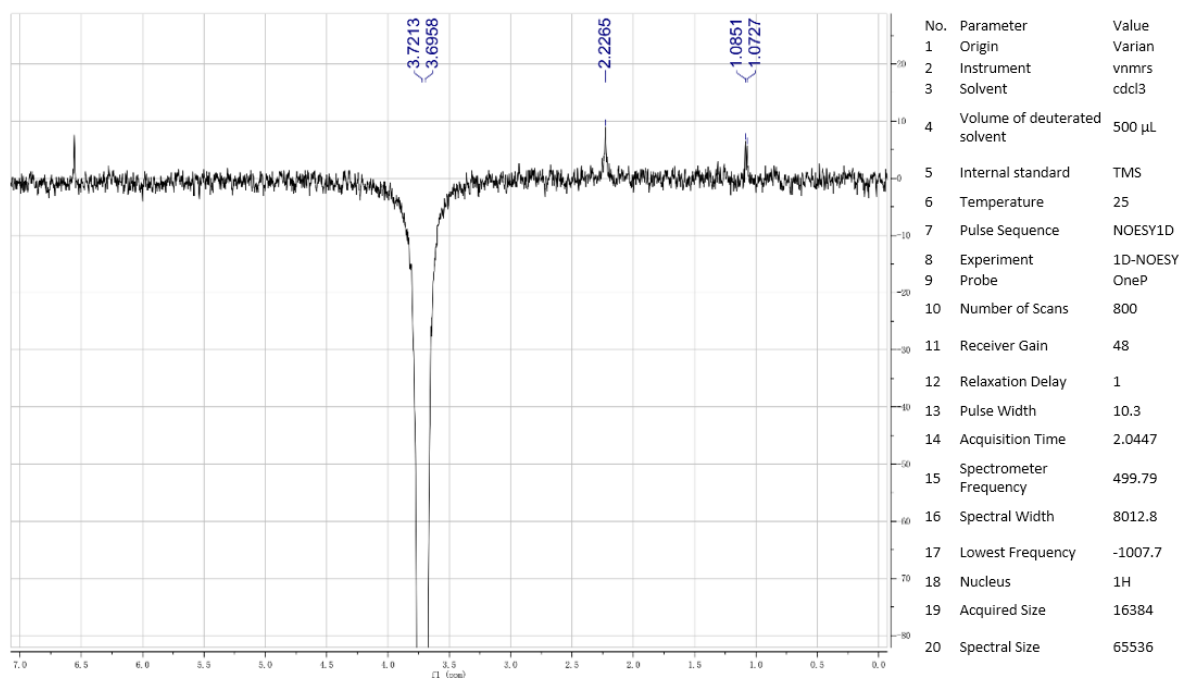



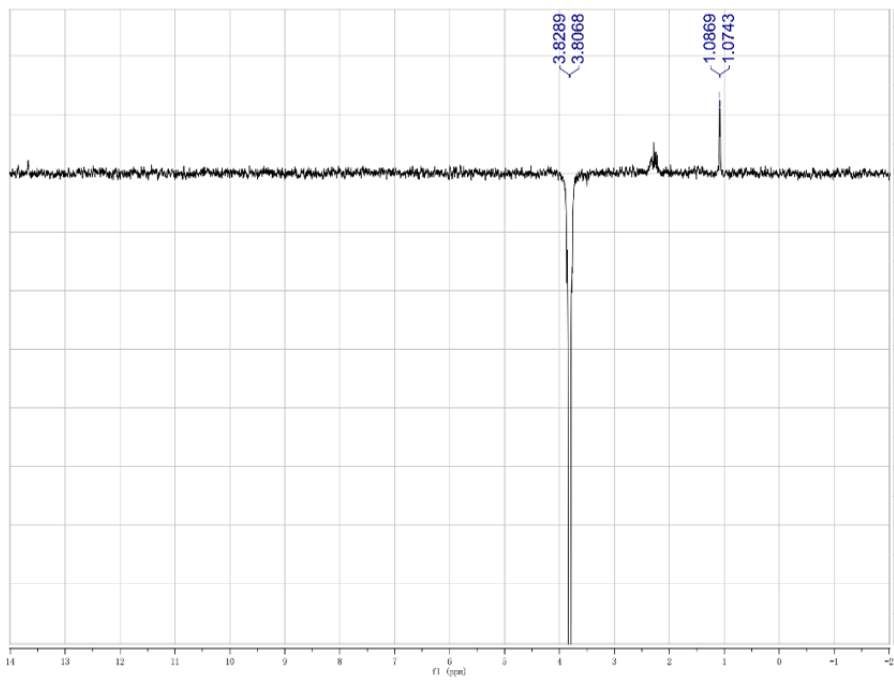

| No. | Parameter                    | Value    |
|-----|------------------------------|----------|
| 1   | Origin                       | Varian   |
| 2   | Instrument                   | vnmrs    |
| 3   | Solvent                      | cdcl3    |
| 4   | Volume of deuterated solvent | 500 µL   |
| 5   | Internal standard            | TMS      |
| 6   | Temperature                  | 25       |
| 7   | Pulse Sequence               | NOESY1D  |
| 8   | Experiment                   | 1D-NOESY |
| 9   | Probe                        | OneP     |
| 10  | Number of Scans              | 136      |
| 11  | Receiver Gain                | 50       |
| 12  | Relaxation Delay             | 1        |
| 13  | Pulse Width                  | 10.3     |
| 14  | Acquisition Time             | 2.0447   |
| 15  | Spectrometer Frequency       | 499.79   |
| 16  | Spectral Width               | 8012.8   |
| 17  | Lowest Frequency             | -1007.7  |
| 18  | Nucleus                      | 1H       |
| 19  | Acquired Size                | 16384    |
| 20  | Spectral Size                | 65536    |

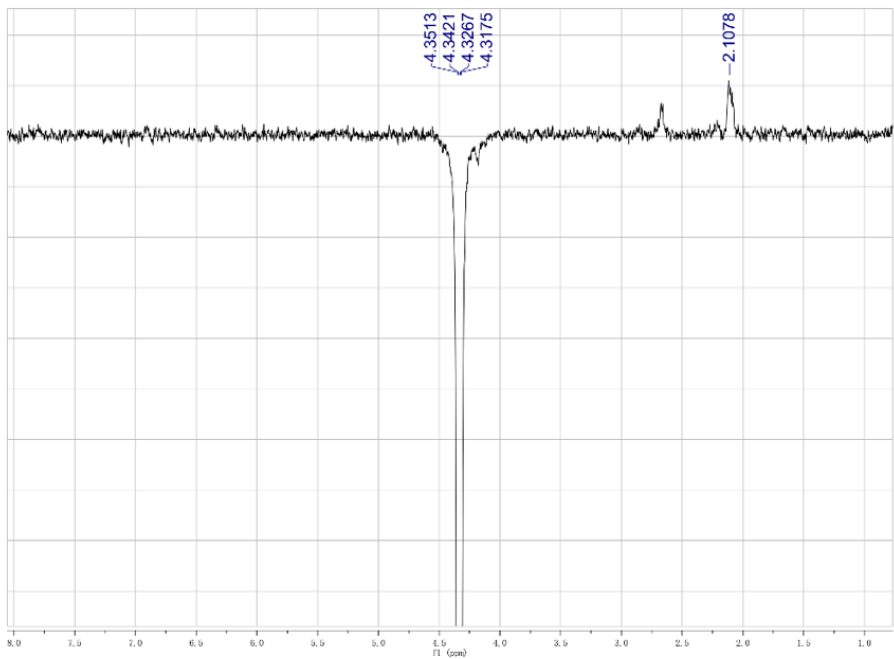

| No. | Parameter                    | Value    |
|-----|------------------------------|----------|
| 1   | Origin                       | Varian   |
| 2   | Instrument                   | vnmrs    |
| 3   | Solvent                      | cdcl3    |
| 4   | Volume of deuterated solvent | 500 µL   |
| 5   | Internal standard            | TMS      |
| 6   | Temperature                  | 25       |
| 7   | Pulse Sequence               | NOESY1D  |
| 8   | Experiment                   | 1D-NOESY |
| 9   | Probe                        | OneP     |
| 10  | Number of Scans              | 224      |
| 11  | Receiver Gain                | 50       |
| 12  | Relaxation Delay             | 1        |
| 13  | Pulse Width                  | 10.3     |
| 14  | Acquisition Time             | 2.0447   |
| 15  | Spectrometer Frequency       | 499.79   |
| 16  | Spectral Width               | 8012.8   |
| 17  | Lowest Frequency             | -1007.7  |
| 18  | Nucleus                      | 1H       |
| 19  | Acquired Size                | 16384    |
| 20  | Spectral Size                | 65536    |

Figure S21. HRESIMS spectrum of versixanthone O (3)

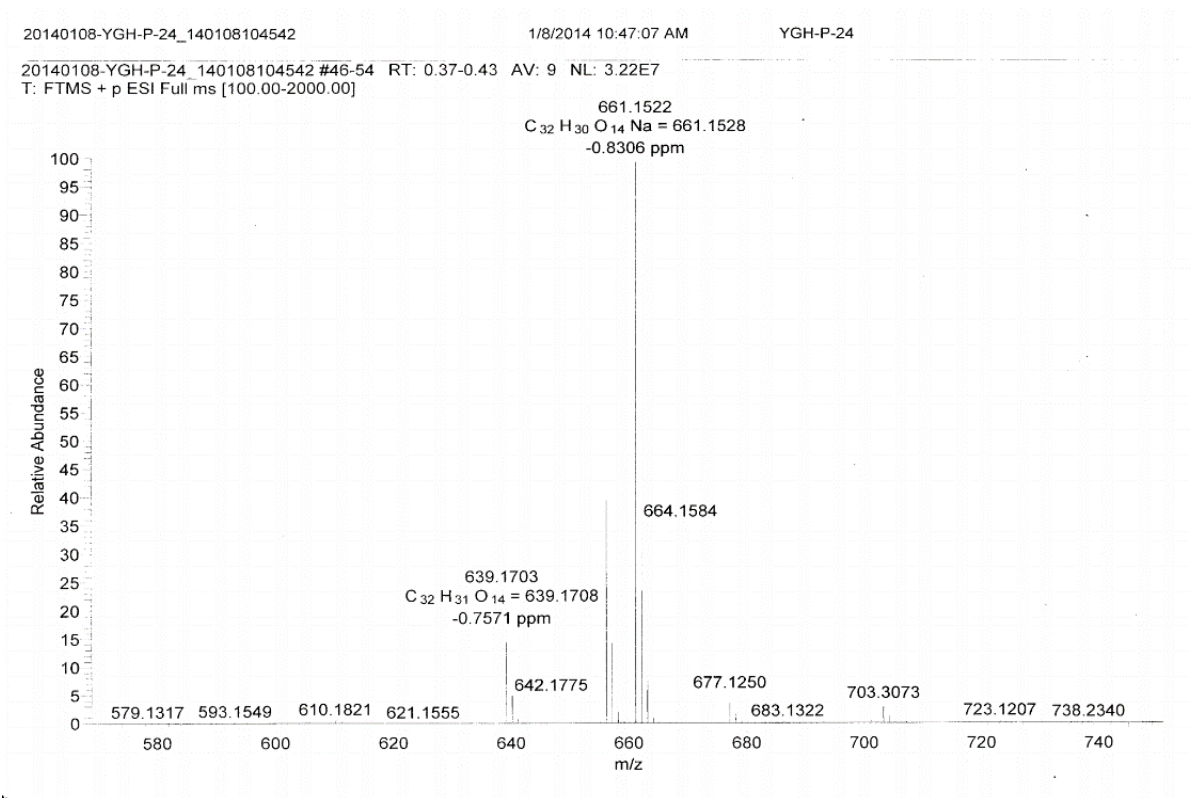

Supplement: marinedrugs-16-00335-s001.pdf [file marinedrugs-16-00335-s001.pdf]
